# Supplementary material for: Ambulance crew‐initiated non‐conveyance in the Helsinki EMS system—A retrospective cohort study
Source: PubMed Central journal article supplement (PMC9544076; doi:10.1111/aas.14049), 2022-02-28
Supplement: AAS-66-625-s002.pdf [file AAS-66-625-s002.pdf]

**ADDITIONAL TABLE 1: Age-adjusted relative risk of mortality for patients with multiple risk factors**

| Number of risk factors present | Systolic blood pressure | Blood oxygen saturation | Respiratory rate | Level of consciousness | Unable to walk | Shortness of breath | All patients (RR) | Nursing home resident (RR) | General EMS patient (RR) |
|--------------------------------|-------------------------|-------------------------|------------------|------------------------|----------------|---------------------|-------------------|----------------------------|--------------------------|
| 0                              |                         |                         |                  |                        |                |                     | 1.0               | 1.0                        | 1.0                      |
| 1                              |                         |                         |                  |                        |                | x                   | 2.7               | 2.1                        | 2.8                      |
| 1                              |                         |                         |                  |                        | x              |                     | 3.1               | 2.9                        | 2.4                      |
| 1                              |                         |                         |                  | x                      |                |                     | 2.7               | 2.1                        | 2.5                      |
| 1                              |                         |                         | x                |                        |                |                     | 1.4               | 2.4                        | 1.1                      |
| 1                              |                         | x                       |                  |                        |                |                     | 2.6               | 2.0                        | 2.7                      |
| 1                              | x                       |                         |                  |                        |                |                     | 2.5               | 2.6                        | 2.3                      |
| 2                              |                         |                         |                  |                        | x              | x                   | 8.3               | 5.9                        | 6.7                      |
| 2                              |                         |                         |                  | x                      |                | x                   | 7.1               | 4.3                        | 6.8                      |
| 2                              |                         |                         |                  | x                      | x              |                     | 8.2               | 5.9                        | 5.8                      |
| 2                              |                         |                         | x                |                        |                | x                   | 3.9               | 4.9                        | 3.2                      |
| 2                              |                         |                         | x                |                        | x              |                     | 4.5               | 6.7                        | 2.7                      |
| 2                              |                         |                         | x                | x                      |                |                     | 3.9               | 4.8                        | 2.8                      |
| 2                              |                         | x                       |                  |                        |                | x                   | 6.9               | 4.1                        | 7.6                      |
| 2                              |                         | x                       |                  |                        | x              |                     | 8.0               | 5.6                        | 6.5                      |
| 2                              |                         | x                       |                  | x                      |                |                     | 6.9               | 4.1                        | 6.6                      |
| 2                              |                         | x                       | x                |                        |                |                     | 3.7               | 4.7                        | 3.1                      |
| 2                              | x                       |                         |                  |                        |                | x                   | 6.5               | 5.3                        | 6.3                      |
| 2                              | x                       |                         |                  |                        | x              |                     | 7.5               | 7.2                        | 5.4                      |
| 2                              | x                       |                         |                  | x                      |                |                     | 6.5               | 5.2                        | 5.5                      |
| 2                              | x                       |                         | x                |                        |                |                     | 3.5               | 6.0                        | 2.6                      |
| 2                              | x                       | x                       |                  |                        |                |                     | 6.3               | 5.0                        | 6.1                      |
| 3                              |                         |                         |                  | x                      | x              | x                   | 20.4              | 11.4                       | 15.5                     |
| 3                              |                         |                         | x                |                        | x              | x                   | 11.7              | 12.9                       | 7.6                      |
| 3                              |                         |                         | x                | x                      |                | x                   | 10.1              | 9.6                        | 7.7                      |
| 3                              |                         |                         | x                | x                      | x              |                     | 11.6              | 12.7                       | 6.6                      |
| 3                              |                         | x                       |                  |                        | x              | x                   | 19.9              | 11.0                       | 17.1                     |
| 3                              |                         | x                       |                  | x                      |                | x                   | 17.3              | 8.1                        | 17.4                     |
| 3                              |                         | x                       |                  | x                      | x              |                     | 19.8              | 10.9                       | 15.0                     |
| 3                              |                         | x                       | x                |                        |                | x                   | 9.8               | 9.2                        | 8.6                      |
| 3                              |                         | x                       | x                |                        | x              |                     | 11.3              | 12.3                       | 7.3                      |
| 3                              |                         | x                       | x                | x                      |                |                     | 9.7               | 9.1                        | 7.5                      |
| 3                              | x                       |                         |                  |                        | x              | x                   | 18.9              | 13.8                       | 14.5                     |
| 3                              | x                       |                         |                  | x                      |                | x                   | 16.4              | 10.3                       | 14.8                     |
| 3                              | x                       |                         |                  | x                      | x              |                     | 18.8              | 13.6                       | 12.8                     |
| 3                              | x                       |                         | x                |                        |                | x                   | 9.2               | 11.6                       | 7.2                      |
| 3                              | x                       |                         | x                |                        | x              |                     | 10.7              | 15.3                       | 6.2                      |
| 3                              | x                       |                         | x                | x                      |                |                     | 9.2               | 11.5                       | 6.3                      |
| 3                              | x                       | x                       |                  |                        |                | x                   | 15.9              | 9.9                        | 16.3                     |
| 3                              | x                       | x                       |                  |                        | x              |                     | 18.3              | 13.1                       | 14.1                     |
| 3                              | x                       | x                       |                  | x                      |                |                     | 15.9              | 9.8                        | 14.3                     |
| 3                              | x                       | x                       | x                |                        |                |                     | 8.9               | 11.1                       | 7.0                      |
| 4                              |                         |                         | x                | x                      | x              | x                   | 27.7              | 22.5                       | 17.5                     |
| 4                              |                         | x                       |                  | x                      | x              | x                   | 43.3              | 19.7                       | 36.0                     |
| 4                              |                         | x                       | x                |                        | x              | x                   | 27.0              | 21.8                       | 19.2                     |
| 4                              |                         | x                       | x                | x                      |                | x                   | 23.7              | 16.9                       | 19.6                     |
| 4                              |                         | x                       | x                | x                      | x              |                     | 26.9              | 21.6                       | 17.0                     |
| 4                              | x                       |                         |                  | x                      | x              | x                   | 41.5              | 23.7                       | 31.3                     |
| 4                              | x                       |                         | x                |                        | x              | x                   | 25.7              | 26.0                       | 16.4                     |
| 4                              | x                       |                         | x                | x                      |                | x                   | 22.5              | 20.6                       | 16.7                     |
| 4                              | x                       |                         | x                | x                      | x              |                     | 25.6              | 25.8                       | 14.4                     |
| 4                              | x                       | x                       |                  |                        | x              | x                   | 40.6              | 23.0                       | 34.1                     |
| 4                              | x                       | x                       |                  | x                      |                | x                   | 36.1              | 18.0                       | 34.6                     |
| 4                              | x                       | x                       |                  | x                      | x              |                     | 40.5              | 22.8                       | 30.5                     |
| 4                              | x                       | x                       | x                |                        |                | x                   | 22.0              | 20.0                       | 18.3                     |
| 4                              | x                       | x                       | x                |                        | x              |                     | 25.0              | 25.1                       | 15.9                     |
| 4                              | x                       | x                       | x                | x                      |                |                     | 21.9              | 19.8                       | 16.2                     |
| 5                              |                         | x                       | x                | x                      | x              | x                   | 55.0              | 34.0                       | 39.8                     |
| 5                              | x                       |                         | x                | x                      | x              | x                   | 53.0              | 38.6                       | 34.8                     |
| 5                              | x                       | x                       |                  | x                      | x              | x                   | 73.4              | 35.4                       | 62.6                     |
| 5                              | x                       | x                       | x                |                        | x              | x                   | 52.0              | 37.8                       | 37.7                     |
| 5                              | x                       | x                       | x                | x                      |                | x                   | 46.9              | 31.8                       | 38.3                     |
| 5                              | x                       | x                       | x                | x                      | x              |                     | 51.8              | 37.6                       | 33.9                     |
| 6                              | x                       | x                       | x                | x                      | x              | x                   | 85.8              | 49.4                       | 67.4                     |

Age dependent risk for all groups is adjusted to median age of whole study population (63.2 years).

Base risk (Relative Risk=1) for each group is the risk of patients with no risk factors.

Relative Risk=1: All patients 0.72%, Nursing home patients 1.46%. General EMS patients 0.69%.

Highest risk combinations within each patient group are highlighted, RR= Relative risk.
